# Supplementary material
Source: Springer Nature journal article supplement (https://www.springermedizin.de/resource/supplementary/13023_2009_180_MOESM1_ESM.pdf/9641802)

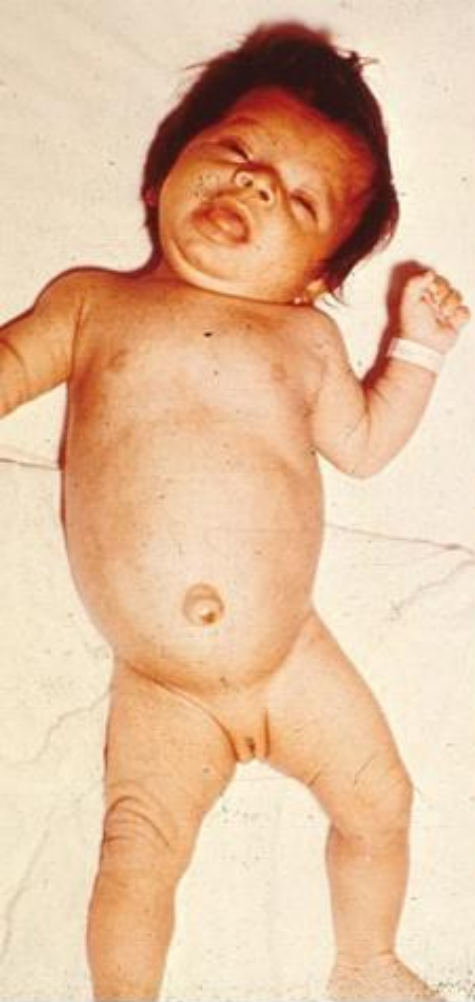

A

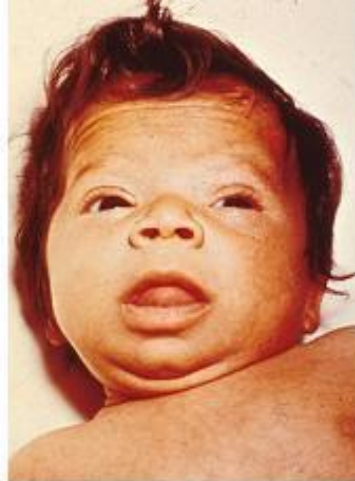

B

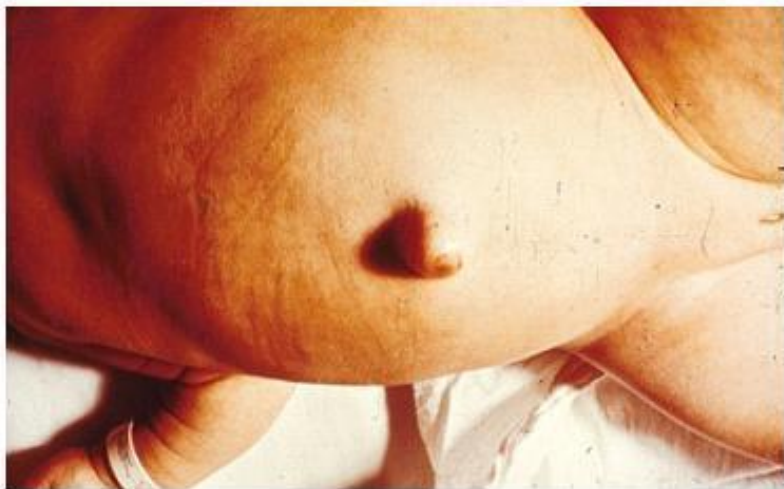

C

Supplement: MOESM1 [file 9641802]
